# Supplementary material for: A robust method to calculate the volume phase transition temperature (VPTT) for hydrogels and hybrids
Source: Royal Society of Chemistry journal article supplement (doi:10.1039/c7ra10258e), 2017-01-01
Supplement: c7ra10258e1.pdf [file c7ra10258e1.pdf]

## Supporting Information

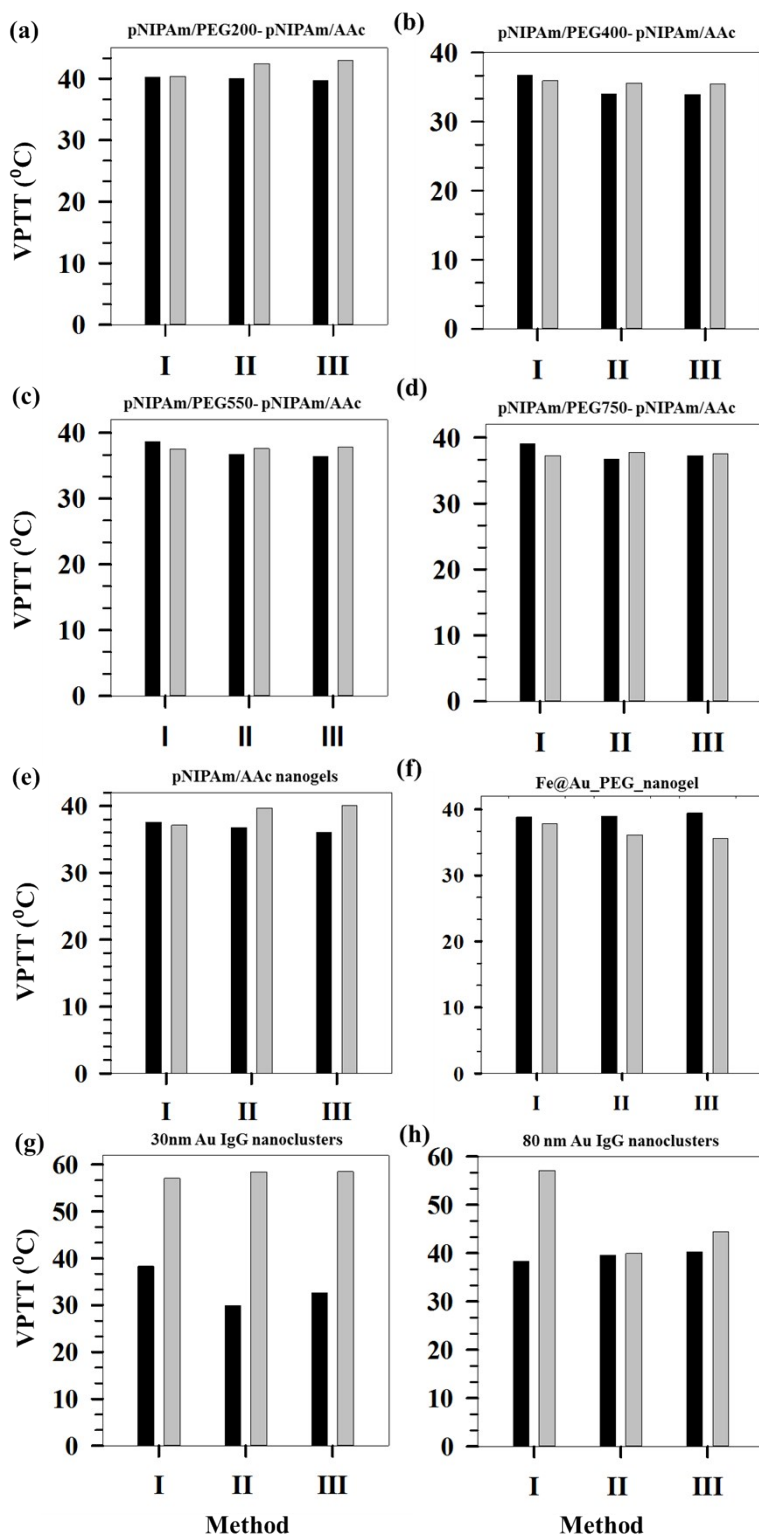

**Figure S1.** Heating and cooling VPTTs for different samples calculated using Method I, Method II and Method III respectively (a) pNIPAm/PEG200-pNIPAm/AAc (b) pNIPAm/PEG400-pNIPAm/AAc (c) pNIPAm/PEG550-pNIPAm/AAc (d) pNIPAm/PEG750-pNIPAm/AAc (e) pNIPAm/AAc nanogels (f) Fe@Au\_PEG\_nanogel (g) 30nm Au IgG nanoclusters and (h) 80nm Au IgG nanoclusters.

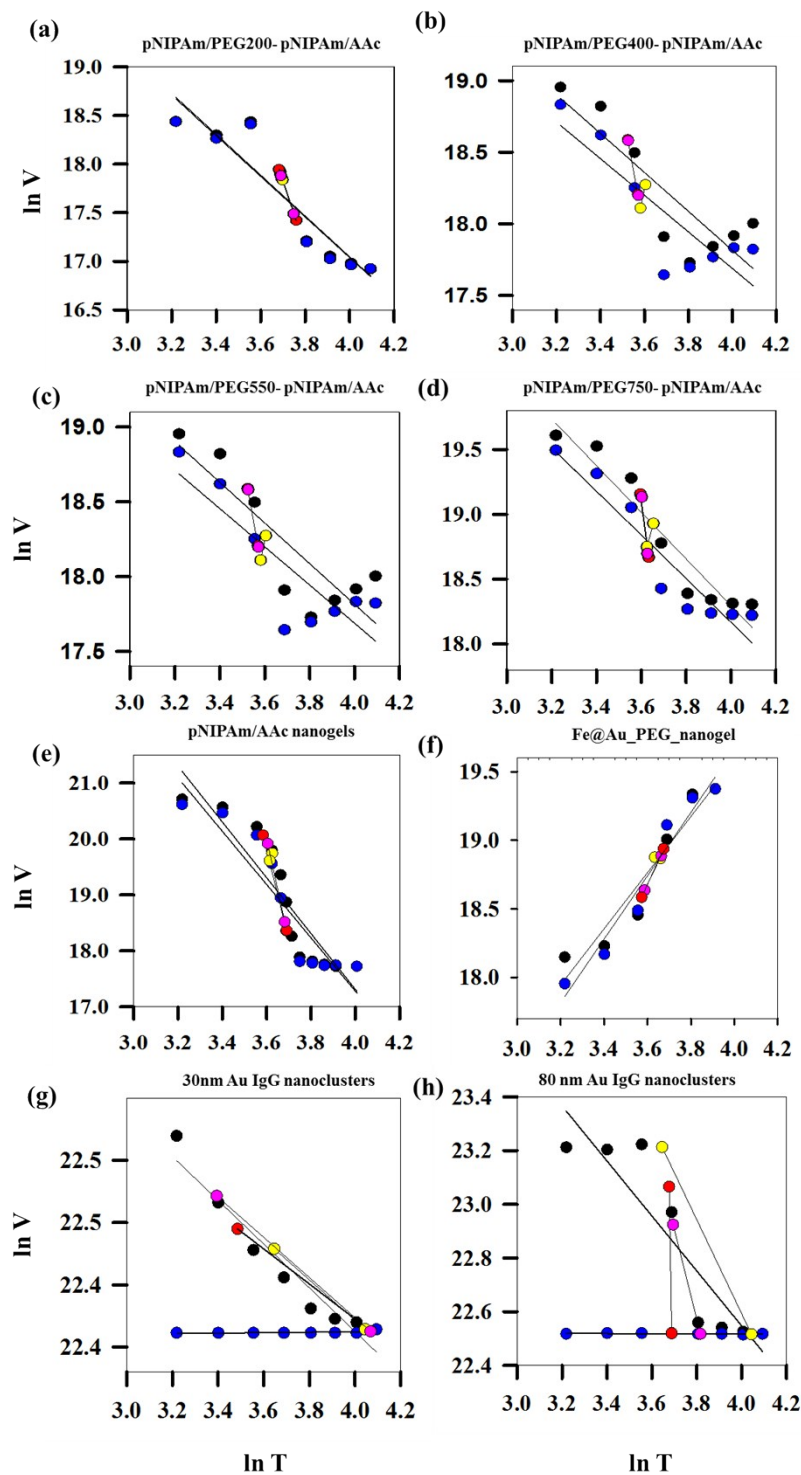

**Figure S2.** Regression analysis for (a) pNIPAm/PEG200-pNIPAm/AAc (b) pNIPAm/PEG400-pNIPAm/AAc (c) pNIPAm/PEG550-pNIPAm/AAc (d) pNIPAm/PEG750-pNIPAm/AAc (e) pNIPAm/AAc nanogels (f) Fe@Au\_PEG\_nanogel (g) 30nm Au IgG nanoclusters and (h) 80nm Au IgG nanoclusters using experimental datasets. Yellow, pink and red points refer to volumes

obtained at the calculated VPTTs for the respective systems using methods I, II and III respectively.
